# Supplementary material
Source: HighWire-hosted journal article supplement (http://www.ajnr.org/highwire/filestream/72987/field_highwire_adjunct_files/0/19-01085.pdf)
Supplement: 19-01085.pdf [file 19-01085.pdf]

**On-line Table 1: Demographic characteristics of patients with lytic bone lesions<sup>a</sup>**

|                                     | Total      | Manual     | Battery-Powered | P Value |
|-------------------------------------|------------|------------|-----------------|---------|
| No.                                 | 422        | 241        | 181             |         |
| Age (mean) (yr)                     | 62 ± 13    | 62 ± 14    | 61 ± 11         | .263    |
| Sex (M/F)                           | 221:201    | 133:108    | 88:93           | .201    |
| Suspected origin of primary disease |            |            |                 | .063    |
| Bone <sup>b</sup>                   | 56.2 (237) | 49 (118)   | 65.7 (119)      |         |
| Prostate                            | 2.1 (9)    | 3.7 (9)    | 0 (0)           |         |
| Breast                              | 8.1 (34)   | 9.5 (23)   | 6.1 (11)        |         |
| Lung                                | 2.8 (12)   | 4.6 (11)   | 0.6 (1)         |         |
| Kidney                              | 0.9 (4)    | 1.2 (3)    | 0.6 (1)         |         |
| Systemic <sup>c</sup>               | 0.5 (2)    | 0.4 (1)    | 0.6 (1)         |         |
| Liver                               | 0.2 (1)    | 0.4 (1)    | 0 (0)           |         |
| Bladder                             | 0.5 (2)    | 0.4 (1)    | 0.6 (1)         |         |
| Miscellaneous <sup>d</sup>          | 6.4 (27)   | 7.5 (18)   | 5.0 (9)         |         |
| Unestablished/unknown <sup>e</sup>  | 19.9 (84)  | 21.2 (51)  | 18.2 (33)       |         |
| Blood                               | 2.4 (10)   | 2.1 (5)    | 2.8 (5)         |         |
| Location of bone lesion             |            |            |                 | .316    |
| Vertebral column                    | 45.7 (193) | 43.6 (105) | 48.6 (88)       |         |
| Pelvis                              | 46 (194)   | 46.1 (111) | 45.9 (83)       |         |
| Extremity                           | 7.6 (32)   | 9.5 (23)   | 5.0 (9)         |         |
| Miscellaneous <sup>f</sup>          | 0.7 (3)    | 0.8 (2)    | 0.6 (1)         |         |
| Disc                                | 0 (0)      | 0 (0)      | 0 (0)           |         |

<sup>a</sup> Values for frequency of suspected origin of primary disease and lesion location represent percentages followed by total number of cases in parentheses.

<sup>b</sup> Primary bone lesions include suspected multiple myeloma from laboratory testing.

<sup>c</sup> Predominantly sarcoidosis.

<sup>d</sup> Includes thyroid, salivary gland, vulvar, tongue, melanoma, and anal cancers.

<sup>e</sup> Includes all cases without known malignancy or suspected primary bone lesion.

<sup>f</sup> Includes sternum, ribs, clavicle, scapula, calvaria, and tarsal bones.

**On-line Table 2: Demographic characteristics of patients with sclerotic bone lesions<sup>a</sup>**

|                                     | Total     | Manual    | Battery-Powered | P Value |
|-------------------------------------|-----------|-----------|-----------------|---------|
| No.                                 | 110       | 55        | 55              |         |
| Age (mean)                          | 61 ± 15   | 60 ± 14   | 62 ± 15         | .283    |
| Sex (M/F)                           | 57:53     | 31:24     | 26:29           | .445    |
| Suspected origin of primary disease |           |           |                 | .691    |
| Bone <sup>b</sup>                   | 6.4 (7)   | 7.3 (4)   | 5.5 (3)         |         |
| Prostate                            | 11.8 (13) | 9.1 (5)   | 14.5 (8)        |         |
| Breast                              | 24.5 (27) | 23.6 (13) | 25.5 (14)       |         |
| Lung                                | 4.5 (5)   | 7.3 (4)   | 1.8 (1)         |         |
| Kidney                              | 0 (0)     | 0 (0)     | 0 (0)           |         |
| Systemic <sup>c</sup>               | 1.8 (2)   | 3.6 (2)   | 0 (0)           |         |
| Liver                               | 0.9 (1)   | 1.8 (1)   | 0 (0)           |         |
| Bladder                             | 7.3 (8)   | 7.3 (4)   | 7.3 (4)         |         |
| Miscellaneous <sup>d</sup>          | 20.9 (23) | 20 (11)   | 21.8 (12)       |         |
| Unestablished/unknown <sup>e</sup>  | 19.1 (21) | 16.4 (9)  | 21.8 (12)       |         |
| Blood                               | 2.7 (3)   | 3.6 (11)  | 1.8 (1)         |         |
| Location of bone lesion             |           |           |                 | .355    |
| Vertebral column                    | 68.2 (75) | 61.8 (34) | 74.5 (41)       |         |
| Pelvis                              | 20 (22)   | 23.6 (13) | 16.4 (9)        |         |
| Extremity                           | 11.8 (13) | 14.5 (8)  | 9.1 (5)         |         |
| Miscellaneous <sup>f</sup>          | 0 (0)     | 0 (0)     | 0 (0)           |         |
| Disc                                | 0 (0)     | 0 (0)     | 0 (0)           |         |
| Density (mean) (HU)                 | 663       | 641       | 682             | .505    |

<sup>a</sup> Values for frequency of suspected origin of primary disease and lesion location represent percentages followed by total number of cases in parentheses.

<sup>b</sup> Primary bone lesions include suspected multiple myeloma from laboratory testing.

<sup>c</sup> Predominantly sarcoidosis.

<sup>d</sup> Includes thyroid, salivary gland, vulvar, tongue, melanoma, and anal cancers.

<sup>e</sup> Includes all cases without known malignancy or suspected primary bone lesion.

<sup>f</sup> Includes sternum, ribs, clavicle, scapula, calvaria, and tarsal bones.
